# Supplementary material
Source: MDPI journal article supplement (https://www.mdpi.com/1999-4907/8/11/410)

# Supplementary Material: Deterministic Models of Growth and Mortality for Jack Pine in Boreal Forests of Western Canada

Vlad C. Strimbu <sup>1,\*</sup>, Mike Bokalo <sup>1</sup> and Philip G. Comeau <sup>1</sup>

Figure S1: Observed vs predicted for the independent validation data ( $n=34$ ) using MGM stand predictions with respective validation metrics: average mean bias (AMB), relative mean bias (RMB) and efficiency (EF). The shown variables are: average DBH, average height, top height, density, stand basal area and stand volume for coniferous and deciduous component, respectively.

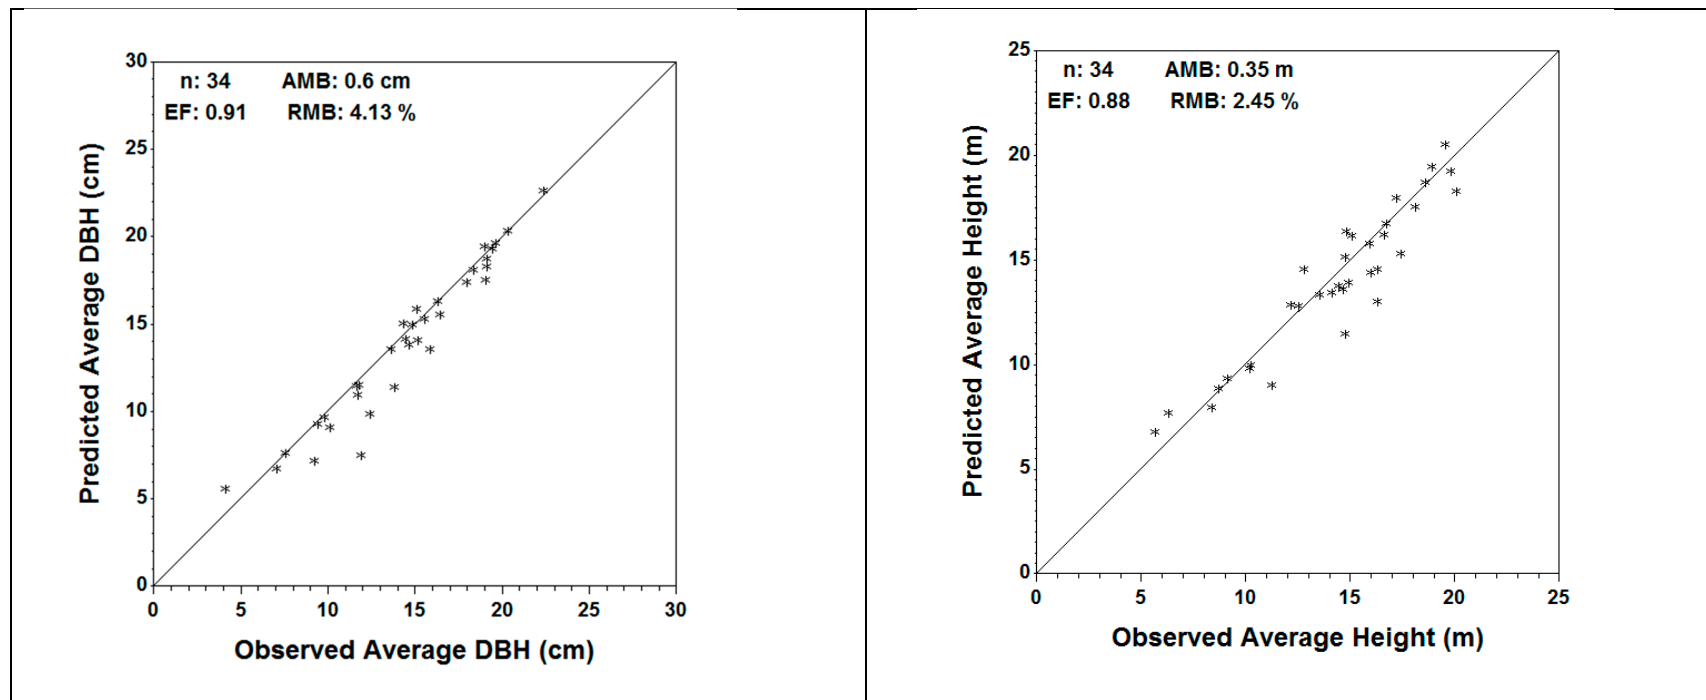

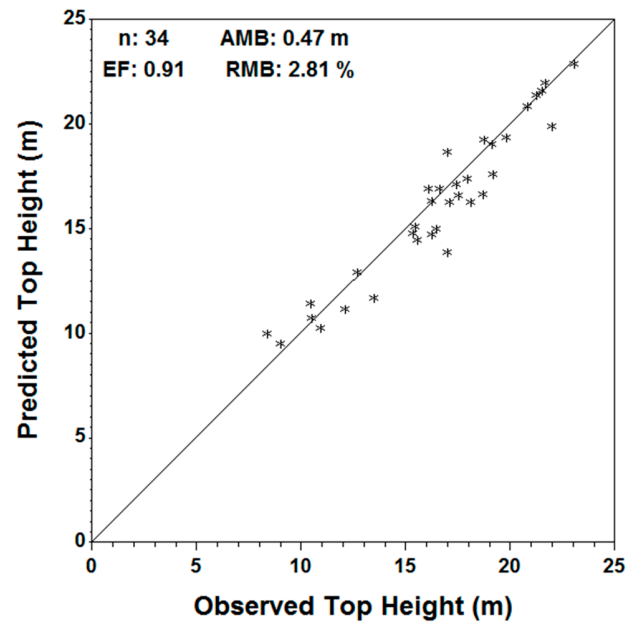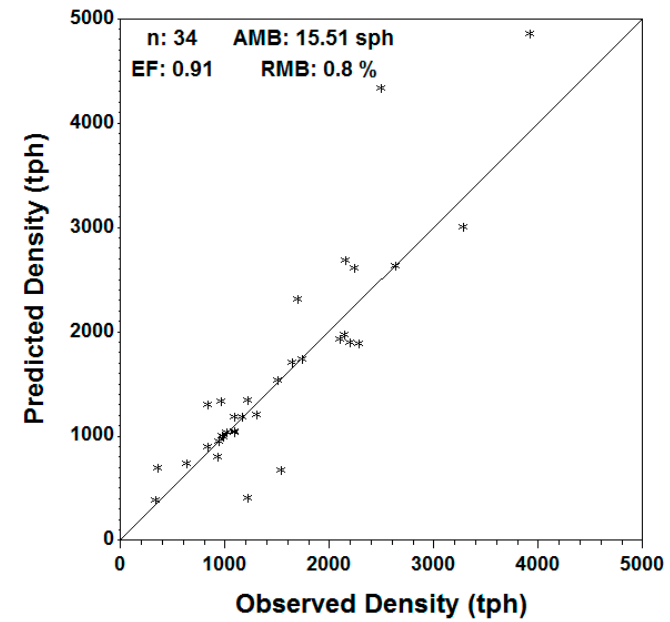

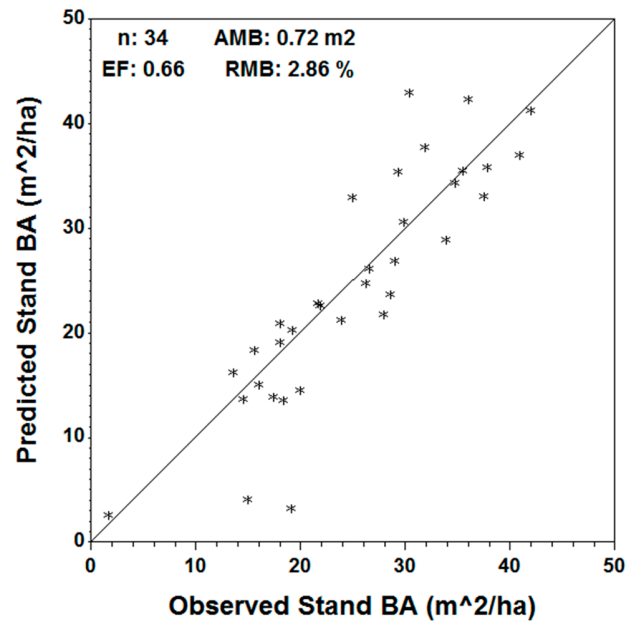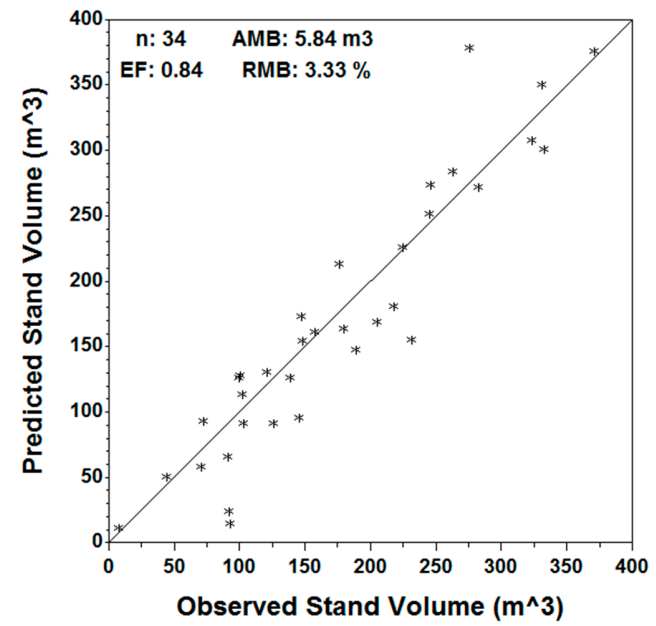

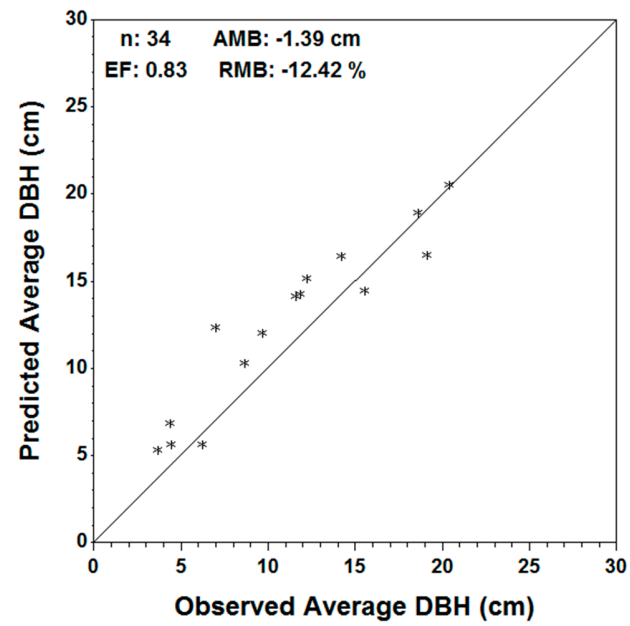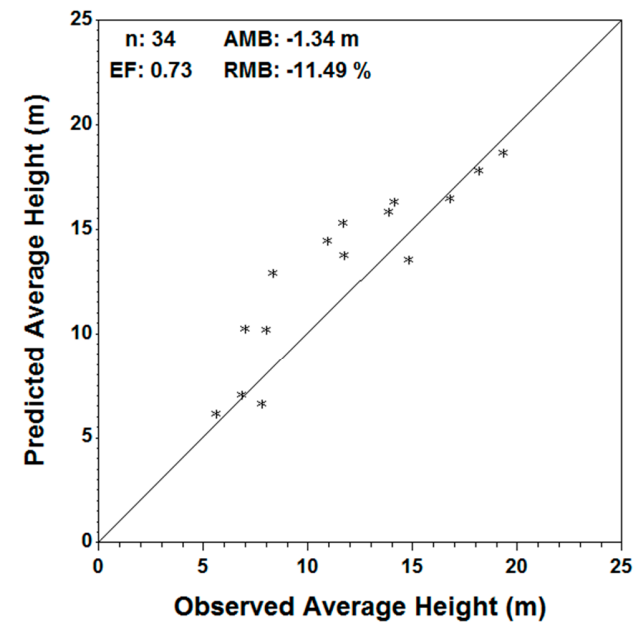

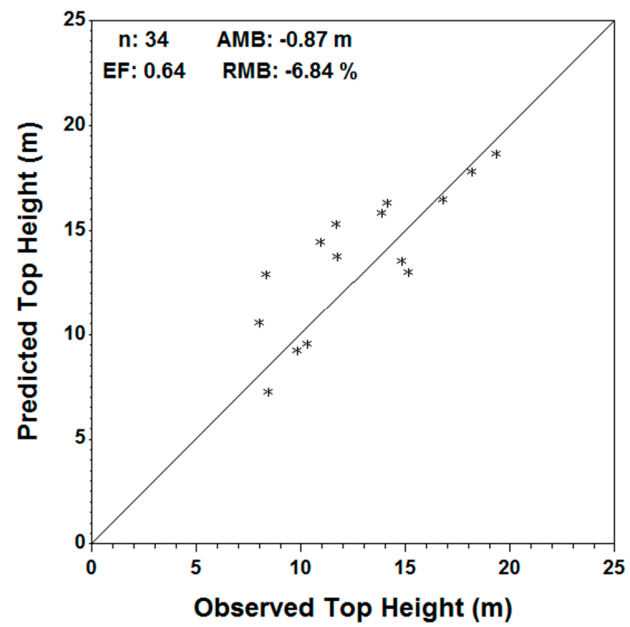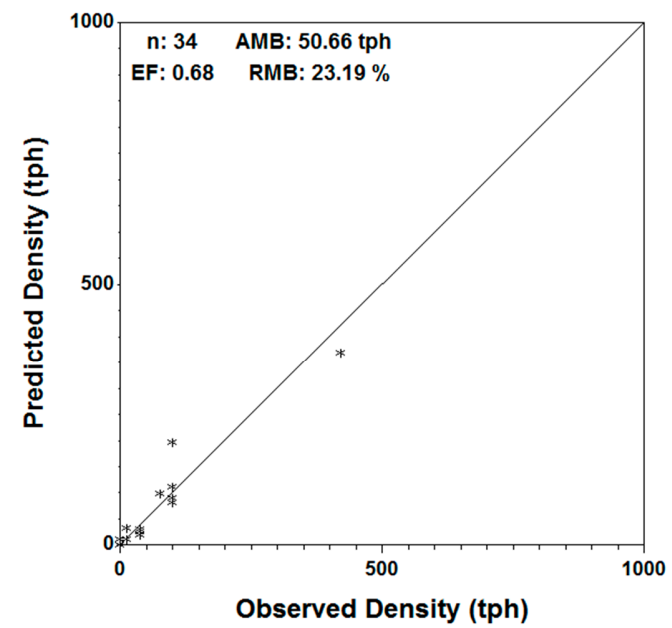

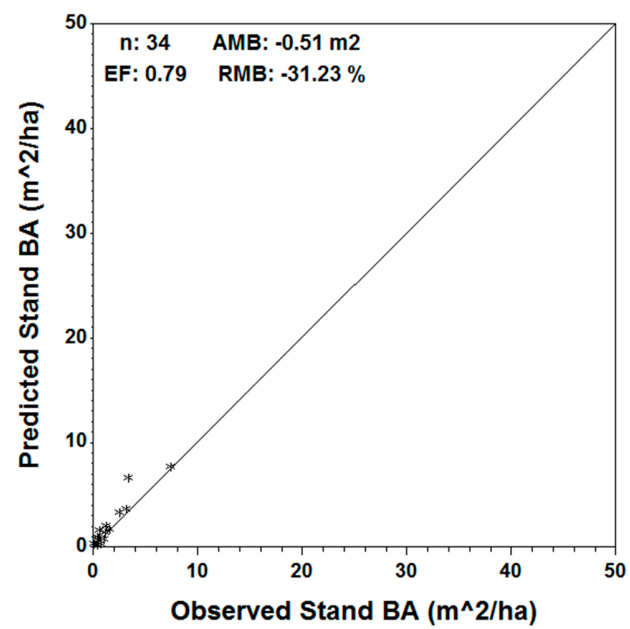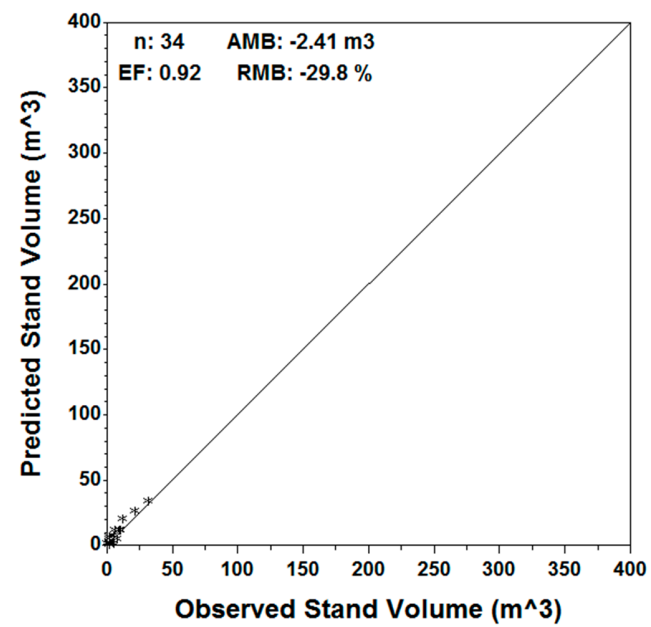

Supplement: s1 [file s1]
